# Supplementary material
Source: PubMed Central journal article supplement (PMC10211356)
Supplement: i1537-2073-25-3-124_s01.pdf [file i1537-2073-25-3-124_s01.pdf]

**Table S1.** Subspecialized and Specialized Services Provided to People with MS in ACT

| Provider                                     | Name                                  | DESDE Code(s)                            | Public/<br>Private | FTE<br>for MS | Town /<br>Suburb | Area of<br>Coverage     |
|----------------------------------------------|---------------------------------------|------------------------------------------|--------------------|---------------|------------------|-------------------------|
| Subspecialized services (multiple sclerosis) |                                       |                                          |                    |               |                  |                         |
| MS Ltd                                       | MS Ltd                                | AX[G35]-A4.2.1 e g v<br>AX[G35]-A5.6 e   | Public             | 7.0           | Deakin           | ACT                     |
| Canberra Hospital (CHS)                      | MS Clinic <sup>a</sup>                | AX[G35]-O8.1 hw                          | Public             | 0.8           | Garran           | ACT-<br>Southern<br>NSW |
| MS Nurse                                     | MS Nurse                              | GX[G35][GZ3]-O10.1 es                    | Private            | 0.5           | Sydney<br>(NSW)  | ACT-<br>Southern<br>NSW |
| NeuroSpace                                   | NeuroSpace                            | AX[G35][ICF]-O8.1 b                      | Private            | 3.0           | Phillip          | ACT                     |
| People with MS Taking Control (group)        | People with MS Taking Control (group) | Gx[G35]-S1.3ge                           | Public             | NA            | Deakin           | ACT-<br>Southern<br>NSW |
| Specialized services (neurology)             |                                       |                                          |                    |               |                  |                         |
| Canberra Hospital (CHS)                      | Acute neurology ward                  | AX[G0-99][G49]-R2<br>AX[G0-99][G49]-o3.1 | Public             | NA            | Garran           | ACT-<br>Southern<br>NSW |
| Canberra Hospital (CHS)                      | Day treatment services                | GX[ICD]-D0.1 h<br>GX[ICD]-D4.1 h         | Public             | NA            | Garran           | ACT-<br>Southern<br>NSW |
| Canberra Hospital (CHS)                      | Hospital in the home                  | GX[ICD]-O1.1                             | Public             | NA            | Garran           | ACT-<br>Southern<br>NSW |
| Canberra Hospital (CHS)                      | General neurology services            | AX[G0-99]-O9.1 hl                        | Public             | NA            | Garran           | ACT-<br>Southern<br>NSW |
| Calvary Hospital                             | Acute ward neurology unit             | GX[G0-99]-R2                             | Public             | NA            | Bruce            | ACT-<br>Southern<br>NSW |
| Calvary Hospital                             | Outpatient neurology unit             | AX[G0-99]-O9.1 hl                        | Public             | NA            | Bruce            | ACT-<br>Southern<br>NSW |
| UC Hospital                                  | Neurological rehabilitation ward      | AX[G0-99][ICF]-R4                        | Public             | NA            | Bruce            | ACT                     |
| UC Hospital                                  | Day program                           | AX[ICD]-D4.1 h                           | Public             | NA            | Bruce            | ACT                     |
| UC Hospital                                  | Ambulatory team                       | AX[ICD]-O8.1 hg                          | Public             | NA            | Bruce            | ACT                     |

|                |                           |                        |         |    |        |     |
|----------------|---------------------------|------------------------|---------|----|--------|-----|
| UC Hospital    | Home-based rehabilitation | AX[ICD]-O5.1.1 h       | Public  | NA | Bruce  | ACT |
| UC Health Hub  | Neurophysiotherapy        | AX[G0-99][ICF]-O9.1 gb | Private | NA | Bruce  | ACT |
| Neurologist #1 | Private neurology clinics | GX[G0-99]-O9.1 u       | Private | NA | Crace  | ACT |
| Neurologist #2 | Private neurology clinics | GX[G0-99]-O9.1 u       | Private | NA | Deakin | ACT |
| Neurologist #3 | Private neurology clinics | GX[G0-99]-O9.1 u       | Private | NA | Deakin | ACT |
| Neurologist #4 | Private neurology clinics | GX[G0-99]-O9.1 u       | Private | NA | Bruce  | ACT |
| Neurologist #5 | Private neurology clinics | GX[G0-99]-O9.1 u       | Private | NA | Bruce  | ACT |
| Neurologist #6 | Private neurology clinics | GX[G0-99]-O9.1 u       | Private | NA | Bruce  | ACT |
| Neurologist #7 | Private neurology clinics | GX[G0-99]-O9.1 u       | Private | NA | Lynham | ACT |
| Neurologist #8 | Private neurology clinics | GX[G0-99]-O9.1 u       | Private | NA | Barton | ACT |
| Neurologist #9 | Private neurology clinics | GX[G0-99]-O9.1 u       | Private | NA | Fisher | ACT |

ACT, Australian Capital Territory; CHS, Canberra Health Services; FTE, full-time equivalent; NSW, New South Wales; UC, University of Canberra.

DESDE codes: GX, all age group; AX, adult (between 17 and 65 years old); G35, people diagnosed with multiple sclerosis; G0-99, people diagnosed with any neurologic diseases; ICF, International Classification of Functioning, Disability, and Health; GZ3, the code for only medication management; A 4.2.1, accessibility to care-high intensity case coordination; A5.6, accessibility to care-advocacy; D0.1, high intensity episodic acute day care; D4.1, health intensity health related nonacute day care; O1.1, health-related acute outreach outpatient care; O3.1, center-based health-related acute outpatient care (low capital because it is not the main service); O5.1.1, health-related high intensity outreach nonacute outpatient care for 3 to 6 days per week; O8.1, high intensity health related center-based nonacute outpatient care; O9.1, health related medium intensity center-based nonacute outpatient care; O10.1, low intensity health related center-based nonacute outpatient care; R2, medium intensity acute hospital care; R4, time limited nonacute residential care with 24 hour physician cover; S1.3, self-help and volunteer care, outpatient care by nonprofessional staff.

DESDE qualifiers: b, when at least 80% of the care provided in the facility is short, time-limited, and episodic; g, services with group activities; e, technology-based services, eg, phone or online services; h, nonresidential care provided in a hospital; l, liaison services provided to people admitted to other speciality services; s, providing specialized care to specific subgroup of the clients; u, care typically delivered by a single health professional; v, provided care can vary over time due to different reasons, eg, financial reasons, system reforming; w, the service is wholly limited to the described activity with no variation. For more detail see Appendix A.

\*Includes all services delivered to people with MS in the hospital.
